# Supplementary material for: Binding properties of cavitands in aqueous solution—the influence of charge on guest selectivity
Source: Royal Society of Chemistry journal article supplement (doi:10.1039/b513408k), 2005-01-01
Supplement: b513408k.pdf [file b513408k.pdf]

## **Binding Properties of Cavitands in Aqueous Solution – Influence of the Upper Rim Charge**

### **Supporting Information**

Clemens H. Haas, Shannon M. Biros and Julius Rebek, Jr.

*The Skaggs Institute for Chemical Biology and the Department of Chemistry, The Scripps  
Research Institute, 10550 N. Torrey Pines Rd., La Jolla, CA 92037*

*e-mail: jrebek@scripps.edu*

**General Considerations.** Deuterated solvents were used as purchased from Cambridge Isotope Laboratories. All other chemicals were obtained from Sigma-Aldrich or Acros chemicals and used without further purification unless otherwise stated.  $^1\text{H}$  and  $^{13}\text{C}$  NMR spectral data were recorded on a Bruker 600-DRX spectrophotometer. Chemical shifts are expressed as parts per million ( $\delta$ ) relative to  $\text{SiMe}_4$  (TMS,  $\delta = 0$ ), and referenced internally with respect to the protio solvent impurity. Electrospray ionization time-of-flight reflectron (ESI-TOF) spectra were determined on an Agilent ESI-TOF mass spectrometer. Molecular modeling (molecular mechanics calculations) was carried out using the AMBER force field with the solvation (dielectric) setting for water as implemented by Macromodel or Maestro (Schroedinger, Inc.) on a Silicon Graphics Octane workstation.

**Cavitand tetra-CBZ-amine 6.** The octanitro cavitand **3** (870mg, 692 $\mu\text{mol}$ , 1.0eq.) and  $\text{SnCl}_2 \cdot 2\text{H}_2\text{O}$  (4.13g, 18.3mmol, 26.0eq.) were suspended in EtOH (70mL). HCl (20mL, 36%) was added and the mixture was stirred at 70°C for 14h. After cooling to room

temperature the pH was adjusted to 12 with 2N NaOH. The precipitate was centrifuged and washed with water, CH<sub>2</sub>Cl<sub>2</sub> and hexane. The residue was dried *in vacuo*. The obtained amine **4** (700mg, 688μmol, 1.0eq.) and the imidate **5** (1,50g, 5.50mmol, 8.0eq.) were suspended in dry EtOH under nitrogen and stirred at 70°C for 20h. The solvent was evaporated and the residue was taken up in acetone and filtered. The filtrate was evaporated and the residue was taken up in CH<sub>2</sub>Cl<sub>2</sub>. The precipitate was filtered off and washed with water and diethyl ether to give a pale yellow solid (823mg, 481μmol, 70%). <sup>1</sup>H-NMR (300 MHz, DMSO-*d*<sub>6</sub>): δ= 0.93 (*t*, 12H, *J* = 6.4), 2.39 (*s*, 8H), 3.97 (*d*, 4H, *J* = 5.8), 4.31 (*s*, 8H), 5.05 (*s*, 8H), 7.20-8.11 (*m*, 46H); ESI-TOF [MH<sup>+</sup>] calcd for C<sub>100</sub>H<sub>84</sub>N<sub>12</sub>O<sub>16</sub> 1709.6201, found 1709.6208.

**Cavitand tetra-ammonium hydrobromide salt 2.** Tetra-CBZ-amine cavitand **6** (50mg, 29.2μmol) was suspended in HBr in acetic acid (33%) (3mL) and stirred for 4h at room temperature. The excess HBr was evaporated and diethylether (20mL) was added. The precipitate was filtered off and dried *in vacuo* to give a light brownish solid (43.3mg, 28.9μmol, 99%). <sup>1</sup>H-NMR (600 MHz, D<sub>2</sub>O/THF-*d*<sub>8</sub> 1:1): δ= 1.10 (*t*, 12H, *J* = 7.1), 2.46 (*t*, 8H, *J* = 7.4), 4.23 (*s*, 4H), 4.56 (*s*, 8H), 5.77 (*t*, 4H, *J* = 8.3), 7.54 (*s*, 4H), 7.79 (*s*, 4H), 8.01 (*s*, 8H); MALDI-TOF [MH<sup>+</sup>] calcd for C<sub>68</sub>H<sub>60</sub>N<sub>12</sub>O<sub>8</sub> 1173, found 1173.
